## **Knot Guilty? An Examination of Testicular Torsion Litigation Trends from 2014 to 2022**

Rahma Menshawey<sup>1\*</sup> MBBCH, Esraa Menshawey<sup>1</sup> MBBCH

1- Cairo University Kasr al Ainy Faculty of Medicine

\* - \*- Corresponding Author, Email address: [rahma.menshawey.94@gmail.com](mailto:rahma.menshawey.94@gmail.com)

Faculty of Medicine, Kasr al Ainy, Cairo University, Geziret Elroda, Manial, Cairo, 11562, Egypt

ORCID: **0000-0002-6755-6623**

Word count: 2194

## Abstract

**Background:** Testicular torsion is a true urological emergency that occurs when the testes twists around the spermatic cord, cutting off its blood supply. The failure to diagnose testicular torsion is a common medicolegal pitfall due to the uncertainty and urgency of the diagnosis and the potential for testicular loss. In this study, we examined the current medicolegal cases that involved testicular torsion using the LexisNexis database for all cases from 2014 to 2022, using the search terms “testicular torsion” and “medical malpractice”. Our final examination included a total of 20 cases.

**Results:** Trends reveal that Emergency doctors and urologists are the most commonly named defendants. Adults and incarcerated persons are common plaintiffs. The average time from presentation to diagnosis of testicular torsion was  $8 \pm 13$  days. The right testicle was the most commonly implicated, and a misdiagnosis was a commonly cited. The average time from testicular torsion diagnosis to filing a case was 4.35 years.

**Conclusions:** Trends reaffirm that testicular torsion remains a high risk of litigation diagnosis, and continued training and education may be needed to remedy the medicolegal pitfalls for this emergency condition.

**Keywords:** Testicular Torsion, Litigation, Pediatric, Emergency, Malpractice, Medicolegal

## Background

“... It is not necessary to practice defensive medicine, but sound medical practice is defensible.(Matteson et al., 2001)”

Testicular torsion is a true urological emergency, which occurs when the testes twists around the spermatic cord, cutting off its blood supply. It requires early surgical intervention in order to potentially salvage the testes as the viability of the testes is directly related to the duration of torsion (Laher et al., 2020).

Testicular torsion is an acute area of litigation due to many factors including uncertainty of the diagnosis, urgency of the diagnosis, and the potential for testicular loss which results in permanent damage and further complications (Matteson et al., 2001). The purpose of this study was to identify and characterize the modern cases of testicular torsion across the time period of 2014 to 2022, and to determine the current trends in the medicolegal landscape involving testicular torsion, based on cases filed in the United States.

## Methods

We searched the LexisNexis Uni Database for "testicular torsion" and "medical malpractice" cases from January 1, 2014, to December 31, 2022. The database contains court cases and legal news, commonly used in medicolegal research. After screening the search results, we identified 33 cases. We excluded cases where defendants were not healthcare entities or practitioners. Data collected from legal documents included the number and specialties of defendants, plaintiff's age (adult or child), affected testicle, time from complaint to torsion diagnosis, time from torsion to case filing, states where cases were filed, use of ultrasound, and relevant medical and legal issues, including expert witness opinions. (see figure 1)

## Results

A total of 57 cases were identified on the Lexis Nexis database. The final analysis was performed on a total of 20 cases. The cases were filed across a variety of states (see figure 2). The majority of testicular torsion cases were filed in the state of New York and Pennsylvania, 25% (n=5) and 15% (n=3) respectively. 45% of the cases examined involved a plaintiff that was a prisoner (n=9). 70% of the cases involved a plaintiff that was an adult

(n=14), while the remaining were children or infants. 55% of cases involved torsion of the right testicle (n = 11), while 30% involved the left testicle (n=6), and in 3 cases the involved testicle was not mentioned in the court documents.

Several medical practitioners and medically related defendants were implicated in the filed cases, including physicians, nurses, nurse practitioners, physician assistants, technicians, hospitals, and hospital networks.

Among the 20 cases, a total of 70 medically relevant defendants were listed. MDs accounted for 47.12% (n=33), while Nurses/NPs accounted for 28.57% (n=20) (Figure 3). Among MD defendants with identifiable specialties, 30% were Emergency physicians (n=10), and 12% were urologists (Figure 4) (see Table 1).

Ultrasound usage was mentioned in 55% of cases (n=11), was not used in 35% of cases, and was not mentioned in 2 cases. Only 20% of cases explicitly mentioned a urological consult. Among cases which specified dates, the average time from symptom onset to testicular torsion diagnosis was  $8 \pm 13$  days, with the longest being 48 days and the shortest being 1 day (see table 2).

For cases indicating both the year of torsion occurrence and case filing, the average time between these events was 4.35 years. The longest time from torsion to case filing was 8 years, and the shortest was 1 year (Figure 5).

Multiple medical and legal issues were identified, including deliberate indifference, failure of informed consent, failure of diagnosis, misdiagnosis, failure to perform ultrasound and examination, inadequate follow-up care, deviation from standard care, infliction of pain, surgical assistance from unrelated specialists, and deliberate withholding of information or identity of defendants (see table 3). A total of 52 explicitly mentioned issues were identified across the cases, averaging 2.6 issues per case. Misdiagnosis was explicitly mentioned in 35% of cases (n=7), with infection/epididymitis as the most common misdiagnosis, along with stomach flu, kidney stone, and inguinal hernia. We provide a narrative summary of the medically relevant context of each case in a supplementary file.

## Discussion

### *Results and Trends*

We examined testicular torsion malpractice litigation from 2014 to 2022. Interesting trends emerged from our analysis. Most cases involved adults, with the right testicle being the most commonly affected. Urological consultations were infrequent in the examined cases. The majority of cases had multiple medically relevant defendants, with physicians and nurses being the most common. Emergency physicians and urologists were the leading specialists named as defendants in testicular torsion litigation.

These trends can be explained by the fact that testicular torsion primarily affects pediatric patients. Consequently, in adults, it may not be prioritized in the differential diagnosis, leading to failures or misdiagnoses with conditions like epididymitis or kidney stones. Additionally, cases involving the left testicle are more common, resulting in potential misdiagnoses of right-sided cases and explaining the higher number of right testicle-related cases.

### *Testicular Torsion and Medical Malpractice*

“...physicians involved in litigation for arguably mismanaged cases of testicular torsion may be at risk for increased financial liability relative to other medical malpractice cases, and the window of concern may be prolonged.” [3]

There are 4 key elements to claim medical practice:

1. The physician has a duty
2. The physician has breached that duty
3. A harm has resulted.
4. And that harm is directly due to the aforementioned breach.

Points 1 and 3 can be easy to prove, while points 2 to 4 can be more challenging [4]. The plaintiff must prove that there was a breach in a standard of care, and that this breach resulted in an approximate harm.

Testicular torsion is an area ripe for litigation due to delays in treatment and diagnosis, and the impact on reproductive function. Indemnity payments are common, and legal outcomes may not be affected by late presenting torsion. Error in diagnosis and lack of or delayed referral are commonly cited causes for liability (Matteson et al., 2001). Testicular salvage studies seem to reaffirm the “6 hour rule”, and so surgical exploration within this time frame maybe considered “legally safe”[6]. Hospitals and physicians may be held liable for the delays under their control, and there are other hurdles to consider such as the patient not immediately presenting on the onset of pain, or seeking care with a general practitioner first, and the time needed for investigations, consults, and availability and preparation of an operating room [6]. Mismanagement or initial misdiagnosis maybe the trigger for litigation as in the cases we examined the named defendant was almost always the first encounter the plaintiff had with a healthcare provider (be that a nurse, physician assistant or physician), and did not often include the surgeon or urologist who actually diagnosed and removed the dead testes. This could explain the rise in naming emergency physicians in lawsuits more commonly over urologists. Urologist or surgeons were named as defendants if the mismanagement or misdiagnosis involved them, like failing to recognise no flow on a scrotal ultrasound. Expert statements by certified urologists are a pivotal part of the cases for both plaintiffs and defendants and often clashed at whether a deviation of care occurred, whether an ultrasound showed testicular torsion, and the decision to proceed with US and further consultation instead of directly proceeding with surgery based on the patients’ initial findings and symptoms. The established idea is that testicular torsion is a true surgical emergency, and that surgical exploration is the only true way to diagnose it is often cited by experts for the plaintiff. This also explains another trend in the litigation literature where having obtained an ultrasound had no bearing on the judicial outcomes. Another area of clash among the expert opinions involved the topic of misdiagnosis.

Literature review reveals interesting findings regarding testicular torsion litigation.

Matteson et al examined files from a large medical malpractice insurance company across 1979 to 1997.

Indemnity payments were made in 67% of cases with a median payout of \$45 000. Urologists were the most

names specialists, and a misdiagnosis (epididymitis) was commonly cited. Late presentation did not affect medicolegal outcomes (Matteson et al., 2001).

Colaco et al examined cases from 1990 to 2013 and found that 51% of trial verdicts were in favor of the defendant across those decades. Emergency medicine doctors accounts for 48% of total defendants while urologists made up 23% of the defendant pool [3]. Among urologists, cases were unsuccessfully defended if the defendant was a resident. No significant differences were found in between ultrasound users and nonusers in the rate of a successful defence. Most common misdiagnosis were epididymitis, gastritis, orchitis, UTI, and kidney stones[3].

Another study examined state appellant cases involving TT from 1985 to 2015. State appeals were in favor of the provider in 50% of cases. Emergency providers were the most commonly sued. Atypical presenting TT was common. Providers who used an US were not more likely to win a state appeal [7].

Clennon et al examined the literature involving testicular torsion and ovarian torsion, and they found that malpractice cases were 38x more likely to arise from testicular torsion cases [8].

One Spanish study examined medical liability claims from 2000 to 2018. Complaints were reported on first consultation. U/S was only performed in 7.5% of cases [9]. Another study examined cases across Spain and France. The most common misdiagnosis was Orchiepididymitis and gastritis or abdominal pain. Urologists were the most frequently implicated specialists in both countries. It was recommended that proper filling of emergency reports and medical records is essential for defending possible malpractice claims [10].

One study examined 2 additional cases. In one case a patient was discharged from the ED after an unremarkable abdominal and pelvic CT. Genital examination was not performed. The next day the patient returned to the ED and the testicle was removed. A settlement was reached at \$300 000. In the next case a patient arrives to the ED and appendicitis is ruled out by CT (surgeon consult), and TT ruled out incorrectly by a radiologist consult on scrotal ultrasound. The emergency physician was sued, and the case did not name the radiologist. The logic in this case was that the Emergency physician should have been able to make a clinical correlation that the

radiologist could not. The jury awarded verdict for the plaintiff and a \$500 000 award. The authors stress the following points [11]:

- Presentation circumstances may not always indicate the diagnosis of testicular torsion (TT). For instance, TT can occur during sleep due to spontaneous cremasteric contractions. Relying solely on historical features may be insufficient.
- Despite ultrasound (US) being considered a "gold standard," it is not infallible. If clinical suspicion of TT remains high, a consultation with a urologist is necessary. Seeking a consult establishes a strong defensible position.

## **Conclusions**

This study has certain limitations, including potential delays in case availability on databases due to updates within the court systems. Legal cases often lack medically relevant details that may be more valuable to a medical audience. Nevertheless, legal databases have been crucial in providing essential information for analyzing medicolegal concerns. In conclusion, testicular torsion remains a high-risk emergency condition associated with litigation. Trends consistently point to emergency physicians and urologists as the most commonly named defendants. Adults and incarcerated individuals are frequently identified as plaintiffs during the examined period. Misdiagnosis remains a significant medicolegal pitfall.

Litigation research on medical malpractice associated conditions, such as our study, can provide insight into areas that require more support such as targeted interventions, with the hope of prevention, patient safety, and the reduction of harm. While the literature is predominated by litigation in the United States, and so global research in this area could arise to new and insightful context. Litigation research can also lead to a better understanding of litigation trends, and this can help to guide the efforts involving patient safety and quality care.



## **List of abbreviations:**

TT – Testicular Torsion

US – Ultrasound

## **Declarations**

### **Ethics Approval and Consent to Participate**

Not applicable

### **Consent for Publication**

Not applicable

### **Availability of Data and Material**

All data is available in this manuscript and in additional supplementary files.

### **Competing Interests**

The authors declare no conflict of interest

### **Funding**

No funding was received in the creation of this manuscript

### **Authors Contributions**

RM conceived the idea. RM and EM compiled information, analysed the results, wrote the manuscript and approve its final form. All authors have participated significantly to this work to warrant inclusion as an author based on ICJME guidelines for authorship.

### **Acknowledgements**

Not Applicable

## References:

1. Matteson JR, Stock JA, Hanna MK, et al (2001) Medicolegal aspects of testicular torsion. *Urology* 57:783–786. [https://doi.org/10.1016/S0090-4295\(00\)01049-9](https://doi.org/10.1016/S0090-4295(00)01049-9)
2. Laher A, Ragavan S, Mehta P, Adam A (2020) <p>Testicular Torsion in the Emergency Room: A Review of Detection and Management Strategies</p>. *Open Access Emergency Medicine* Volume 12:237–246. <https://doi.org/10.2147/OAEM.S236767>
3. Colaco M, Heavner M, Sunaryo P, Terlecki R (2015) Malpractice Litigation and Testicular Torsion: A Legal Database Review. *J Emerg Med* 49:849–854. <https://doi.org/10.1016/j.jemermed.2015.06.052>
4. Weinstock MB, Jolliff H (2021) High-Risk Medicolegal Conditions in Pediatric Emergency Medicine. *Emerg Med Clin North Am* 39:479–491. <https://doi.org/10.1016/j.emc.2021.04.001>
5. Matteson JR, Stock JA, Hanna MK, et al (2001) Medicolegal aspects of testicular torsion. *Urology* 57:783–786. [https://doi.org/10.1016/S0090-4295\(00\)01049-9](https://doi.org/10.1016/S0090-4295(00)01049-9)
6. Hadway P, Reynard JM (2013) The six-hour rule for testis fixation in testicular torsion: is it history? *J Clin Urol* 6:84–88. <https://doi.org/10.1177/2051415812472676>
7. Gaither TW, Copp HL (2016) State appellant cases for testicular torsion: Case review from 1985 to 2015. *J Pediatr Urol* 12:291.e1-291.e5. <https://doi.org/10.1016/j.jpuro.2016.03.008>
8. Clennon EK, Fields I, Cooper B, Seideman C (2023) Testicular torsion is overrepresented among malpractice cases for gonadal torsion. *J Pediatr Surg* 58:762–766. <https://doi.org/10.1016/j.jpedsurg.2022.12.001>
9. Vargas-Blasco C, Martin-Fumadó C, Benet-Travé J, et al (2021) Management of testicular torsion in the ER: lessons learned from medical professional liability claims. *Actas Urológicas Españolas (English Edition)* 45:391–397. <https://doi.org/10.1016/j.acuroe.2021.04.001>
10. Vargas-Blasco C, Martin-Fumadó C, Benet-Travé J, et al (2022) Clinical Safety Recommendations for Testicular Torsion: Analysis of 101 Claims Settled with Compensation in Spain and France. *Urol Int* 106:1095–1099. <https://doi.org/10.1159/000526829>
11. Bass J, Couperus K, Pfaff J, Moore G (2018) A Pair of Testicular Torsion Medicolegal Cases with Caveats: The Ball’s in Your Court. *Clin Pract Cases Emerg Med* 2:283–285. <https://doi.org/10.5811/cpcem.2018.10.39497>

## Figure Legends:

Figure 1: Flow chart illustrating the method for identifying relevant cases in the Lexis Nexis database. After screening for relevant cases and excluding duplicates and non-testicular torsion cases, 20 cases remained for examination.

Figure 2: States where the cases were filed. New York had the highest number of filed cases.

Figure 3: Types of defendants. MDs and Nurses were primary defendants.

Figure 4: MD defendant specialists. Consistent with previous trends, emergency physicians and urologists were commonly named as defendants.

Figure 5: A cluster graph representing the time from symptom onset to the diagnosis of testicular torsion in the cases.

## Identification of Testicular Torsion cases using Lexis Nexis

IDENTIFICATION

Records identified from  
Lexis Nexis using the search term  
"Testicular Torsion"  
(n= 57 cases)  
Records retrieved November 20, 2022

SCREENING

Records screened  
(n = 57)

Records excluded:  
(n = 37)

Reasons for exclusion:  
Not a testicular torsion case:  
(n=28)

Duplicated case/case  
update:  
(n = 9)

INCLUSION

Final number of  
Testicular Torsion cases  
analyzed in this study:  
(n=20)

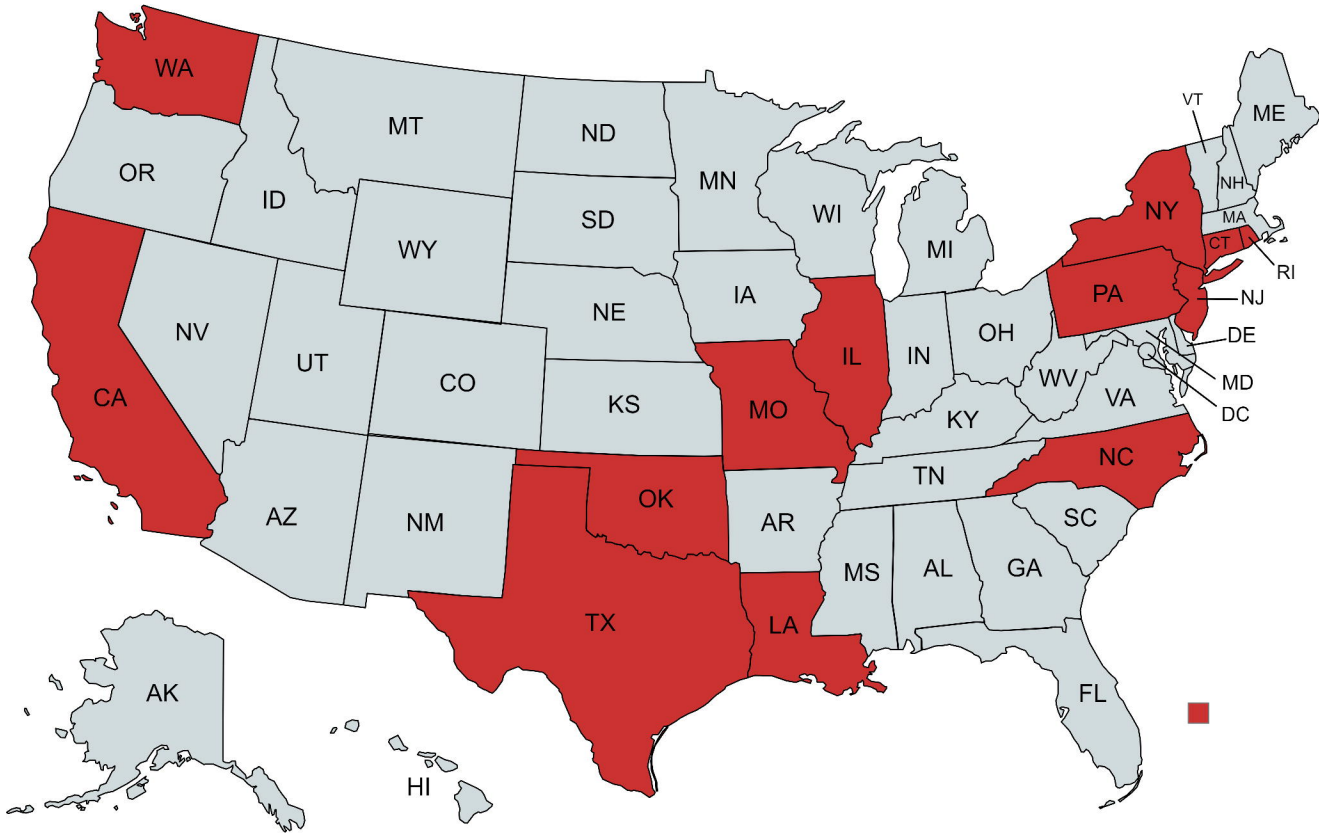

## Types of Medically Relevant Defendants

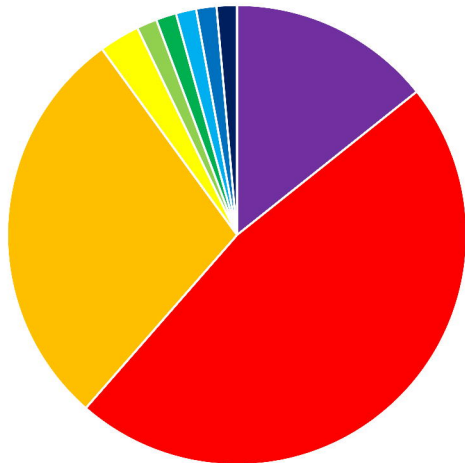

■ Hospital/Hospital Association ■ MD

■ Physician Assistant

■ U/S tech

■ Primary Care Service

■ DO

■ Nurses/NP

■ Health Care Network

■ EM Care Center

## Specialities of Medical Defendants

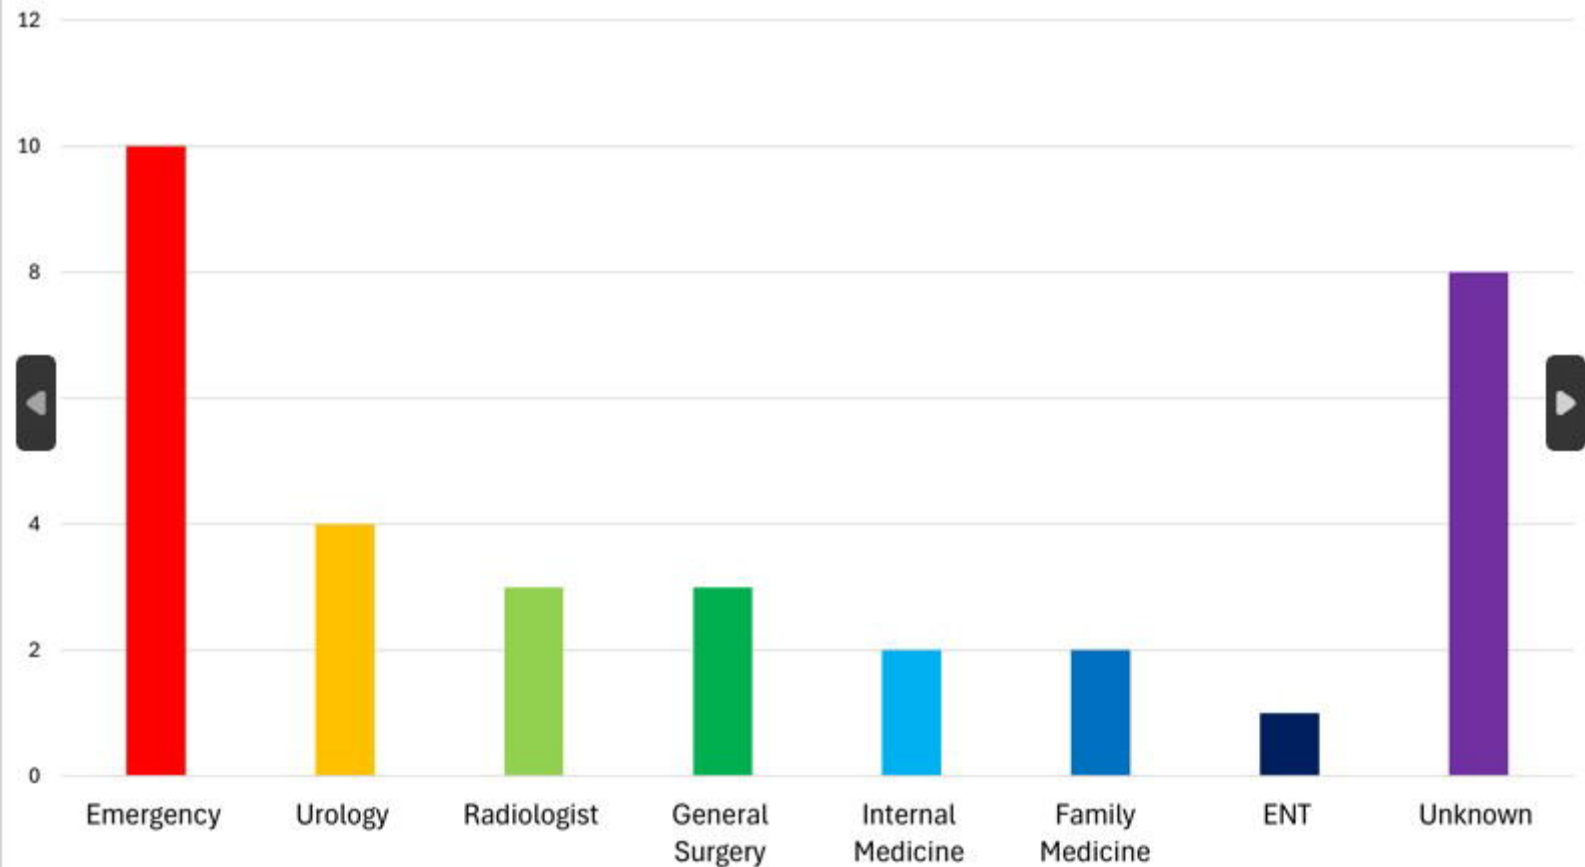

## DAYS BETWEEN ONSET OF SYMPTOMS TO DX OF TT

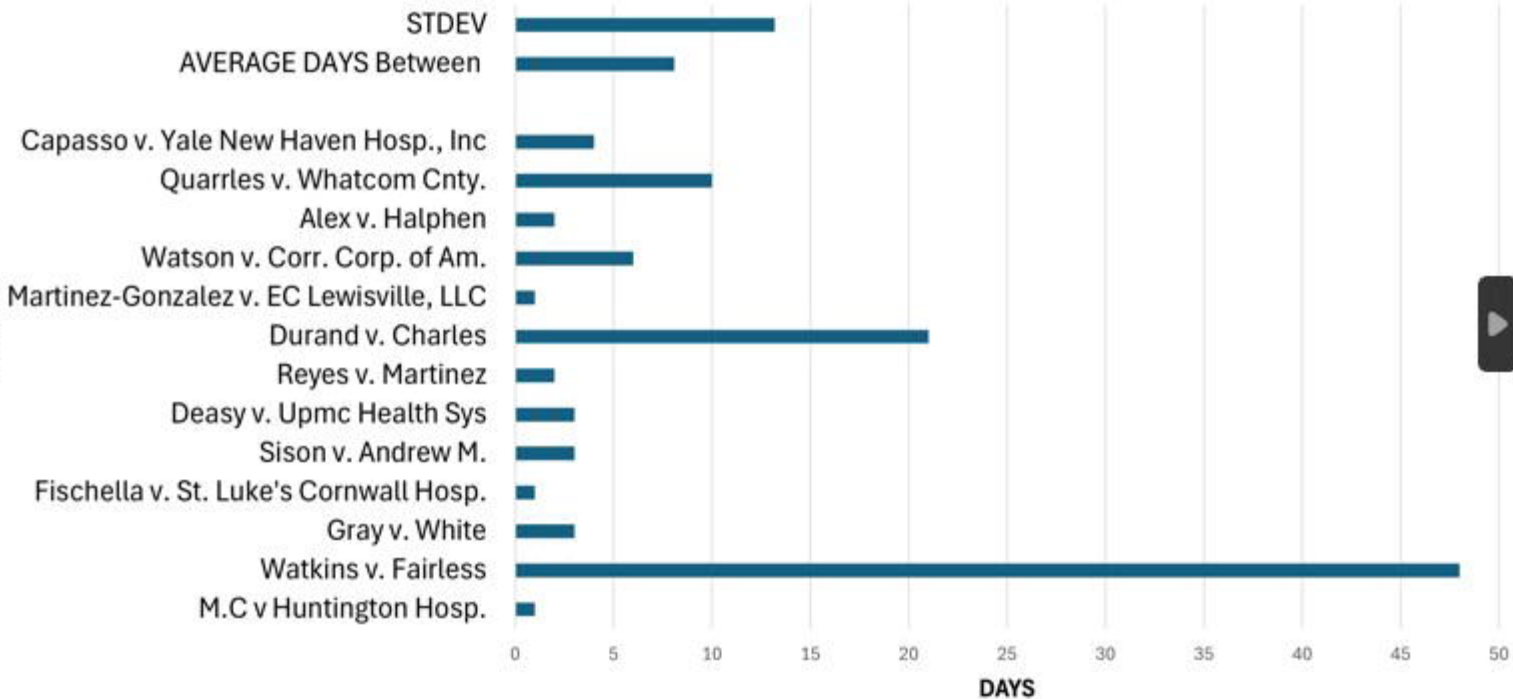



| Case                                                      | State        | Year of Filing | Year Case Filed | Medically Relevant Defendants                                                                                                                                   |
|-----------------------------------------------------------|--------------|----------------|-----------------|-----------------------------------------------------------------------------------------------------------------------------------------------------------------|
| M.C v Huntington Hosp.                                    | NEW YORK     | 2011           | 2019            | HOSPITAL<br>HOSPITAL<br>HOSITAL ASSOCIATION<br><br>MD (ER)<br>MD (ER)<br>MD (ER)                                                                                |
| Watkins v. Fairless                                       | ILINOIS      | 2017           | 2018            | NURSE<br>MD (Internist)                                                                                                                                         |
| Gray v. White                                             | NEW YORK     | 2016           | 2020            | NURSE, NURSE, NURSE<br>+ 3 Jane Doe (Nurses)                                                                                                                    |
| Sipp-Lipscomb v. Einstein Physicians Pennypack Pediatrics | PENNSYLVANIA | 2019           | 2020            | PEDIATRIC PRIMARY CARE SERVICE<br><br>CHILDRENS HOSPITAL<br><br>HEALTHCARE NETWORK<br><br>ULTRASOUND TECH<br><br>MD (UROLOGIST)<br>MD (UROLOGIST)<br>MD, MD, MD |
| Zemsky v. Prokofieva                                      | NEW YORK     | N/A            | 2020            | HOSPITAL<br>MD (EM)<br>Jane Doe MD<br>DO<br>PA (PHYSICIAN ASSISSTANT)                                                                                           |
| Fischella v. St. Luke's Cornwall Hosp.                    | NEW YORK     | 2013           | 2021            | HOSPITAL                                                                                                                                                        |
| Sison v. Andrew M.                                        | TEXAS        | 2013           | 2021            | MD (Radiologist)<br>MD (Emergency Medicine)                                                                                                                     |
|                                                           |              |                |                 | MD<br>NURSE                                                                                                                                                     |

medRxiv preprint doi: <https://doi.org/10.1101/2024.06.30.24309735>; this version posted July 1, 2024. The copyright holder for this preprint (which was not certified by peer review) is the author/funder, who has granted medRxiv a license to display the preprint in perpetuity. It is made available under a [CC-BY-NC-ND 4.0 International license](#).

|                                         |                |      |      |                                                                                                     |
|-----------------------------------------|----------------|------|------|-----------------------------------------------------------------------------------------------------|
|                                         |                | 2010 | 2015 | NURSE                                                                                               |
| Durand v. Charles                       | NORTH CAROLINA | 2013 | 2017 | MD (surgeon)                                                                                        |
| Aliosha v. Ostad                        | NEW YORK       |      |      | MD (urologist)                                                                                      |
|                                         |                | N/A  | 2015 |                                                                                                     |
| Martinez-Gonzalez v. EC Lewisville, LLC | TEXAS          |      |      | Emergency Care center<br>MD (Emergency Medicine)                                                    |
|                                         |                | 2014 | 2017 |                                                                                                     |
| Watson v. Corr. Corp. of Am.            | OKLAHOMA       |      |      | RN<br>LPN (Licenced Practical Nurse)<br>RN<br>RN<br>MD (Family Medicine, later dismissed from suit) |
|                                         |                | 2013 | 2016 |                                                                                                     |
| Brodigan v. Roberts                     | MISSOURI       |      |      | MD (Family Medicine)<br>NP<br>NURSE<br>NP<br>NURSE<br>MD<br>MD (surgeon)<br>MD (EM physician)       |
|                                         |                | 2016 | 2018 |                                                                                                     |
| Alex v. Halphen                         | LOUISIANA      |      |      | PA                                                                                                  |
|                                         |                | 2012 | 2020 |                                                                                                     |
| Quarries v. Whatcom Cnty.               | WASHINGTON     |      |      | MD<br>RN<br>RN                                                                                      |
| Jones v. Dias                           | NEW JERSEY     | 2010 | 2014 |                                                                                                     |
|                                         |                | 2008 | 2014 | MD (Emergency Medicine)<br>HOSPITAL                                                                 |
| Capasso v. Yale New Haven Hosp., Inc    | CONNECTICUT    |      |      | MD (general surgeon)<br>MD (ENT)<br>MD<br>Hospital                                                  |
|                                         |                | 2011 | 2015 |                                                                                                     |

Table 2: Medical and Legal Outcomes of Cases

| CASES                                                   | Orders/verdicts/opinions                                                                                                                                                                                                                                                                                                                                                                                                                                                                                                                                                                                                        | Medical /Legal issues                                                                                          |
|---------------------------------------------------------|---------------------------------------------------------------------------------------------------------------------------------------------------------------------------------------------------------------------------------------------------------------------------------------------------------------------------------------------------------------------------------------------------------------------------------------------------------------------------------------------------------------------------------------------------------------------------------------------------------------------------------|----------------------------------------------------------------------------------------------------------------|
| M.C v Huntington Hosp.                                  | <p>Order reversed.</p> <p>A previous decision of summary judgement for the defendants was not appropriate.</p> <p>Plaintiffs’ expert (pediatric emergency physician) was found to be qualified to render an opinion</p>                                                                                                                                                                                                                                                                                                                                                                                                         | <p>FAILURE OF INFORMED CON</p> <p>FAILURE TO DIAGNOSIS</p> <p>FAILURE OF ATTEMPT OF MA<br/>DETORSION</p>       |
| Watkins v. Fairless                                     | <p>Plaintiff awarded attorney fees due to failure of certain defendants to disclose records during discovery.</p> <p>Court awarded plaintiff \$532, 952 and \$57,522.61 in expenses for Defendants’ discovery violations.</p> <p>Settlement before trial for the MD defendant</p>                                                                                                                                                                                                                                                                                                                                               | <p>FAILURE TO TREAT</p> <p>DELIBERATE INDIFFEREN</p> <p>FAILURE TO DIAGNOSE</p> <p>MISDIAGNOSIS (stomach f</p> |
| Gray v. White                                           | <p>Motion granted in favor of defendant for failure of the complaint to state a claim upon which relief can be granted.</p>                                                                                                                                                                                                                                                                                                                                                                                                                                                                                                     | <p>FAILURE TO TREAT</p> <p>FAILURE TO DIAGNOSE</p> <p>DELIBERATE INDIFFEREN</p>                                |
| Lipscomb v. Einstein Physicians<br>Pennypack Pediatrics | <p>Plaintiff motion for Limine (a motion that asks that certain evidence be found inadmissible) was denied.</p> <p>Defendants motion for summary judgement, along with multiple other notions were all denied.</p> <p>“ It is with a reasonable degree of medical certainty that there was a breach in duty as the physicians should have recognized and commented on the changes in the testicle which would have led to surgical intervention with a probability of saving the testis.”</p> <p>Healthcare networks a services claims that they are not “technically” a hospital, were unpersuasive.</p> <p>Case for trial</p> | <p>DEVIATION OF CARE</p> <p>FAILURE TO DIAGNOS</p>                                                             |
|                                                         | <p>Defendants met the burden of demonstrating</p>                                                                                                                                                                                                                                                                                                                                                                                                                                                                                                                                                                               |                                                                                                                |

|                                        |                                                                                                                                                                                                                                                                                                                     |                                                                                                                                                                                                                                         |
|----------------------------------------|---------------------------------------------------------------------------------------------------------------------------------------------------------------------------------------------------------------------------------------------------------------------------------------------------------------------|-----------------------------------------------------------------------------------------------------------------------------------------------------------------------------------------------------------------------------------------|
|                                        | GRANTED<br><br>“the court finds no evidence of that a genuine issue of material fact remains for trial”                                                                                                                                                                                                             | FAILURE TO TREAT<br><br>INITIAL MISDIAGNOSIS (INFECTIOUS) DELIBERATE INDIFFERENCE                                                                                                                                                       |
| Durand v. Charles                      | Plaintiff has not shown entitlement to judgment as a matter of law.                                                                                                                                                                                                                                                 | FAILURE TO TREAT                                                                                                                                                                                                                        |
| Aliosha v. Ostad                       | Summary judgement for the defendant dismissing the medical malpractice cause of action<br><br>The Plaintiffs expert did not review the U/S images on which they based their opinion, only the report.                                                                                                               | FAILURE OF INFORMED CONSENT<br><br>MEDICAL MALPRACTICE                                                                                                                                                                                  |
| Alvarez-Gonzalez v. EC Lewisville, LLC | Case for trial court.                                                                                                                                                                                                                                                                                               | BREACH OF STANDARD OF CARE<br><br>FAILURE TO DOCUMENT PATIENT SYMPTOMS<br><br>FAILURE TO PERFORM ULTRASOUND<br><br>FAILURE TO EXAMINE THE PATIENT<br><br>FAILURE TO PROVIDE PROPER FOLLOW-UP CARE<br><br>MISDIAGNOSIS (INGUINAL HERNIA) |
| Watson v. Corr. Corp. of Am.           | Plaintiff motion for counsel denied. <sup>1</sup>                                                                                                                                                                                                                                                                   | FAILURE TO DIAGNOSE<br><br>FAILURE TO TREAT<br><br>DELIBERATE INDIFFERENCE<br><br>WANTON INFLICTION OF PAIN<br><br>FAILURE TO PERFORM PHYSICAL EXAMINATION                                                                              |
| Brodigan v. Roberts                    | Court ordered addition of nurse, nurse practitioner, nurse, and doctor as additional defendants to be served in their individual capacities.<br><br>Court ordered that for two of the defendant doctors the complaint is either or both legally frivolous or fails to state a claim in which relief can be granted. | DELIBERATE INDIFFERENCE                                                                                                                                                                                                                 |

|       | Affected Testicle | Plaintiff is a Prisoner? | Child or Adult? | Symptom Onset to Treatment                 | U/S performed?  | Urological Consultation? |
|-------|-------------------|--------------------------|-----------------|--------------------------------------------|-----------------|--------------------------|
|       | RIGHT             | NO                       | CHILD           | MARCH 19 2011<br>MARCH 20 2011             | NO              | NO                       |
|       | N/A               | YES                      | ADULT           | MARCH 9 2015<br>APRIL 26 2015              | YES             | NO MENTION               |
|       | LEFT              | YES                      | ADULT           | OCTOBER 4 2016<br>OCTOBER 7 2016           | N/A             | NO MENTION               |
| n     | N/A               | NO                       | CHILD           | July 23 2019<br>missing date of treatment  | YES             | YES                      |
| trics | RIGHT             | NO                       | ADULT           | NOT MENTIONED                              | YES             | YES                      |
| wall  | LEFT              | YES                      | ADULT           | SEPTEMBER 14 2013<br>SEPTEMBER 15 2013     | YES             | YES                      |
|       | LEFT              | NO                       | CHILD           | MARCH 28 2013<br>MARCH 31 2013             | YES             | NO                       |
| gue   | RIGHT             | YES                      | CHILD           | NOT MENTIONED                              | N/A             | NO MENTION               |
| s     | N/A               | NO                       | CHILD           | JULY 12 2010<br>JULY 15 2010               | YES             | YES                      |
|       | LEFT              | YES                      | ADULT           | MAY 2 2010<br>MAY 4 2010                   | YES             | NO                       |
|       | RIGHT             | YES                      | ADULT           | FEB 1 2013<br>FEB 22 2013                  | YES             | NO                       |
|       | RIGHT             | NO                       | ADULT           | NOT MENTIONED                              | YES             | YES                      |
|       | RIGHT             | NO                       | ADULT           | MARCH 12 2014<br>MARCH 13 2014             | NO <sup>1</sup> | NO                       |
| m.    | LEFT              | YES                      | ADULT           | FEBRUARY 22 2013<br>FEBRUARY 28 2013       | NO              | NO                       |
|       | RIGHT             | YES                      | ADULT           | NO SPECIFIC DATES                          | YES             | NO                       |
|       | LEFT              | NO                       | CHILD           | NOVEMBER 14 2012<br>NOVEMBER 16 2012       | NO              | NO                       |
| y.    | RIGHT             | YES                      | ADULT           | JAN 28 2010<br>FEB 7 2010                  | NO              | NO                       |
|       | RIGHT             | NO                       | ADULT           | June 8 2010<br>missing date of treatment   | NO              | NO                       |
| n     | RIGHT             | NO                       | ADULT           | September 20th 2011<br>September 24th 2011 | NO              | NO                       |
|       | RIGHT             | NO                       | ADULT           | May 2 2013<br>missing date of treatment    | YES             | NO                       |

medRxiv preprint doi: <https://doi.org/10.1101/2024.06.30.24309735>; this version posted July 1, 2024. The copyright holder for this preprint (which was not certified by peer review) is the author/funder, who has granted medRxiv a license to display the preprint in perpetuity. It is made available under a [CC-BY-NC-ND 4.0 International license](#).

performed but not in the initial care center. In this case the plaintiff was urged to seek care in another center which immediately performed the U/S
